# Supplementary material for: Effects of Three Different Family-Based Interventions in Overweight and Obese Children: The “4 Your Family” Randomized Controlled Trial
Source: MDPI journal article supplement (doi:10.3390/nu13020341), 2021-01-24
Supplement: s1 [file s1]

**Supplementary Table S1.** Overview of the topics covered in the intervention, strategies & conveyance method of each by Group.

| Session                                              | Topics                                                                                   | Strategies                                                                | Conveyance Method                       |                              |                                                                                                                      |
|------------------------------------------------------|------------------------------------------------------------------------------------------|---------------------------------------------------------------------------|-----------------------------------------|------------------------------|----------------------------------------------------------------------------------------------------------------------|
|                                                      |                                                                                          |                                                                           | Group 1                                 | Group 2                      | Group 3                                                                                                              |
| Session 1: Nutritional needs of children             | Nutritional needs and goals                                                              | Overview of health outcomes                                               | Trained Dietitian                       | Trained Dietitian throughout | Video by same as Group 1 dietitian                                                                                   |
| Session 2: Managing problematic behaviors            | Increasing children's self-esteem                                                        | Discussing the encountered barriers and the possible resolutions          | Psychologist                            |                              | Video by same as Group 1 psychologist                                                                                |
| Session 3: Practice for success                      | Readiness to change                                                                      | Setting goals                                                             | Psychologist                            |                              | Video by same as Group 1 psychologist                                                                                |
| Session 4: Understanding food pyramid                | Food groups and daily servings                                                           | Eating a healthy balanced diet                                            | Trained Dietitian                       |                              | Video by same as Group 1 dietitian                                                                                   |
| Session 5: Exercise: a friend for your health        | Physical activity goals, children's participation in sport                               | Live fitness show designed for school aged children                       | Delivered by physical education teacher |                              | Video by same as Group 1 physical education teacher                                                                  |
| Session 6: Time for physical activities              | Providing active daily alternatives such as taking the stairs; Improving movement skills | Encourage a minimum of 20 min per day physical activity                   | Delivered by physical education trainer |                              | Video by same as Group 1 physical education teacher                                                                  |
| Session 7: Importance of breakfast                   | Establishing healthy eating routines                                                     | Prioritizing breakfast                                                    | Trained Dietitian                       |                              | Video by same as Group 1 dietitian                                                                                   |
| Session 8: Importance of eating fruits & vegetables  | Encouraging healthy eating behavior                                                      | Increase the amount of fruit and vegetables at home                       | Trained Dietitian                       |                              | Video by same as Group 1 dietitian                                                                                   |
| Session 9: Time for cooking                          | Creating and selecting healthy meals & snacks                                            | Live cooking show                                                         | Chef                                    |                              | Video by same as Group 1 Chef                                                                                        |
| Session 10: Healthy recipes                          | Modifying child friendly recipes for a more healthy but tasty composition                | Creatively involving children in new food preparation & consumption       | Chef                                    |                              | Video by same as Group 1 Chef<br>(the chef encourages parents to involve their child when preparing specific dishes) |
| Session 11: Labels, Fast food & meals away from home | Reducing fat and sugar intake, food labels                                               | Consume fewer processed food and providing examples on how to read labels | Trained Dietitian                       |                              | Video by same as Group 1 dietitian                                                                                   |
| Session 12: Importance of family meal                | Family eating tips                                                                       | Planning and preparing family meals                                       | Trained Dietitian                       |                              | Video by same as Group 1 dietitian                                                                                   |

Group1: on site Group based intervention for children and parents; Group 2: interpersonal face- sessions with highly skilled and trained dietitians; Group 3: homebased specifically created website intervention. All session were conveyed by the dietitian that the child was enrolled too for children in Group 2 and in Group 3, the information was conveyed by specific web developed pages per topic. All health care workers were trained and given specific outlines to follow and questionnaires to complete. Questionnaires were also given to the participants to evaluate understanding and assess health care worker compliance.
